# Supplementary material for: One-step bulk fabrication of a CaO/carbon heterogeneous catalyst from calcium citrate for rapid synthesis of dimethyl carbonate (DMC) by transesterification of ethylene carbonate (EC)
Source: Royal Society of Chemistry journal article supplement (doi:10.1039/d0nj06144a), 2021-01-01
Supplement: d0nj06144a1.pdf [file d0nj06144a1.pdf]

## Supplementary Information

One-step Bulk Fabrication of CaO/Carbon Heterogeneous Catalyst from Calcium Citrate for Rapid Synthesis of Dimethyl Carbonate (DMC) by Transesterification of Ethylene Carbonate (EC)

Qiang Wei <sup>a, b</sup>, Gang Zhang <sup>a, b</sup>, Jie Yao <sup>a</sup>, Xuejun Chen <sup>a</sup>, Gongying Wang <sup>a</sup>, Xiangui Yang <sup>\* a</sup>

<sup>a</sup> Chengdu Institute of Organic Chemistry, Chinese Academy of Sciences, Chengdu 610041, Sichuan, China. \*Corresponding author. E-mail address: yangxg@cioc.ac.cn

<sup>b</sup> National Engineering Laboratory for VOCs Pollution Control Material & Technology, University of Chinese Academy of Sciences, 19A Yuquan Road, Shijingshan District, Beijing 100049, China

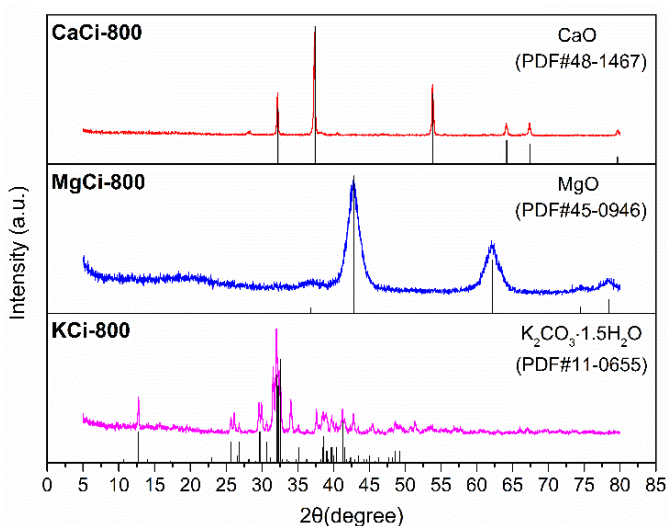

Fig. S1 XRD patterns of the activated citrate salts

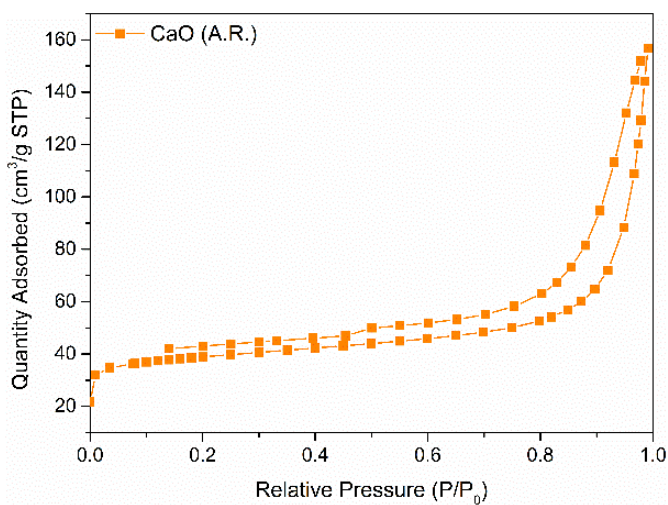

Fig. S2 N<sub>2</sub> adsorption-desorption isotherm of CaO (A.R.)

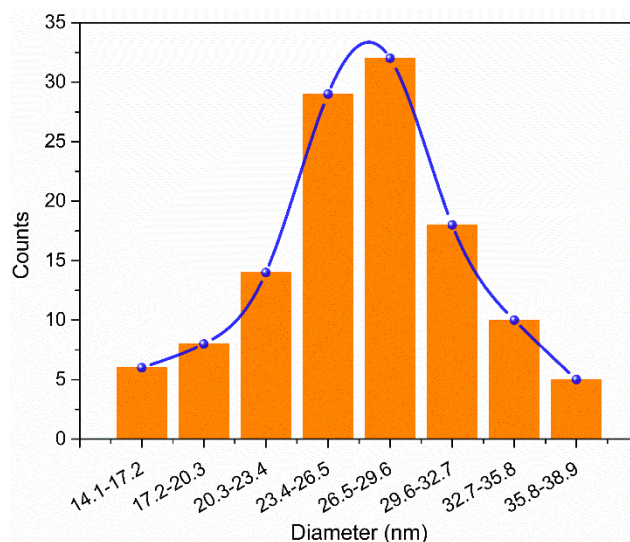

**Fig. S3** Particle size distribution of CaCi-800

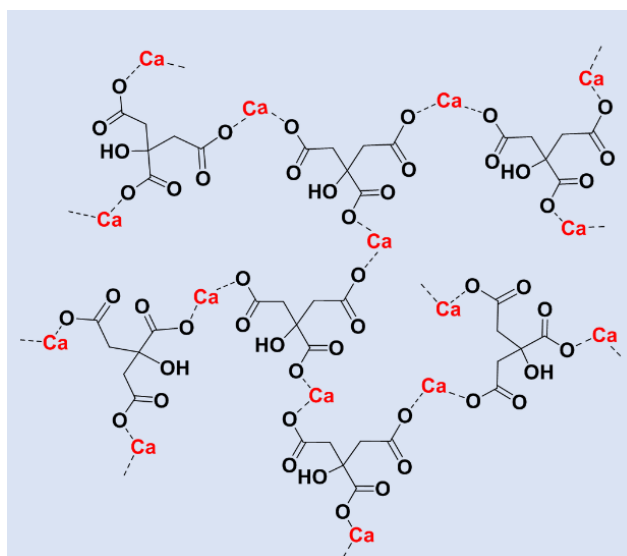

**Fig. S4** The structural formula of calcium citrate

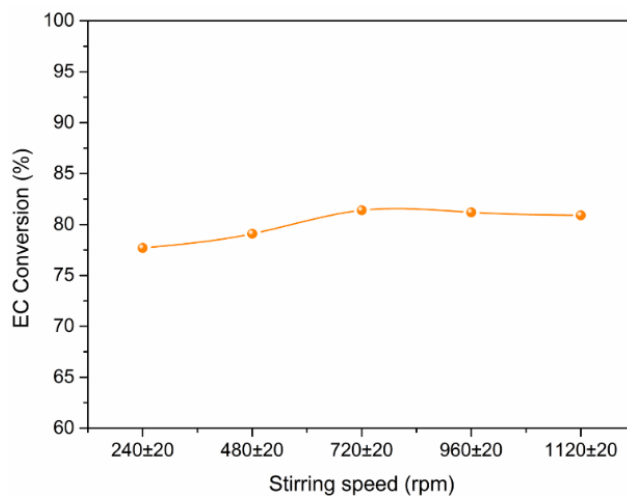

**Fig. S5** Influence of the carbonization temperature on the transesterification reaction with the catalyst amount of 1.5 wt%, the reaction temperature of 65 °C and the stirring speed of 720±20 rpm

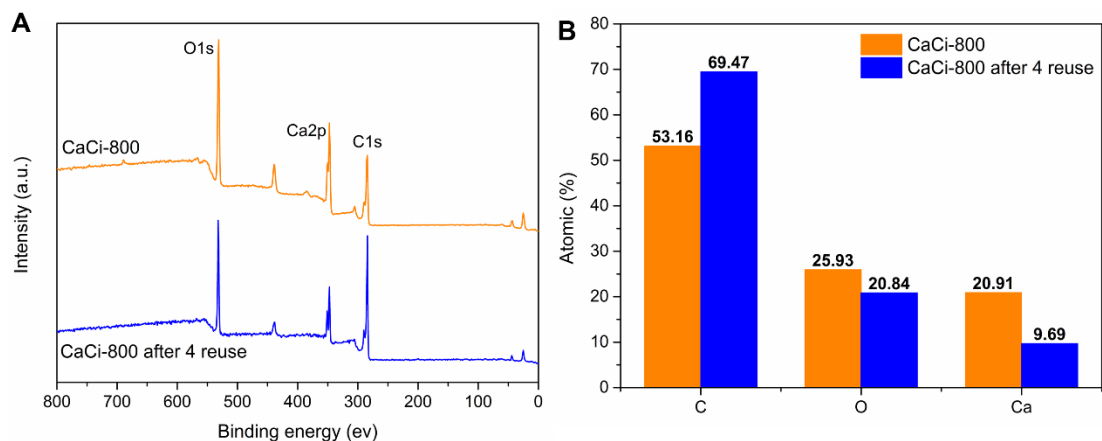

**Fig. S6** (A) XPS spectra and (B) corresponding atomic percentage of fresh CaCi-800 catalyst and fourth reused catalyst washed by methanol

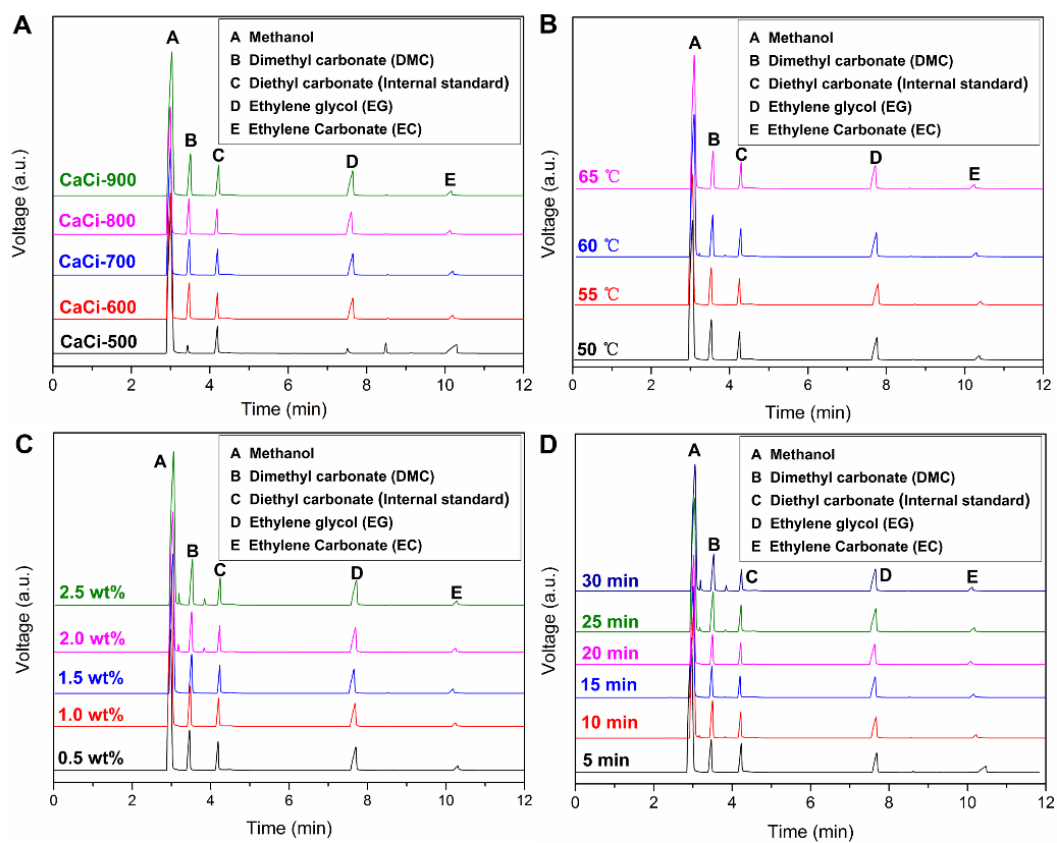

**Fig. S7** Experimental chromatograms under different process conditions: (A) Carbonization temperature, (B) Reaction temperature, (C) Catalyst amount and (D) Reaction time

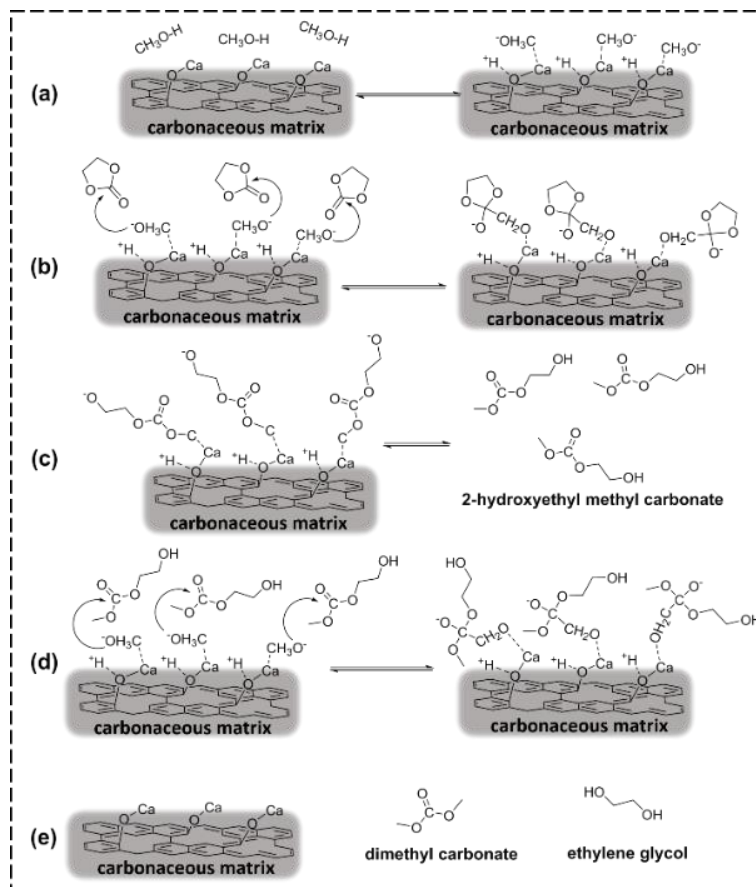

Fig. S8 Possible reaction pathway of DMC synthesis of EC with methanol
